# Supplementary material for: Natural IgG against S-Protein and RBD of SARS-CoV-2 Do Not Bind and Hydrolyze DNA and Are Not Autoimmune
Source: MDPI journal article supplement (doi:10.3390/ijms232213681), 2022-11-08
Supplement: s1 [file s1]

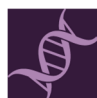

## Supplementary data

**Table S1.** IgG subclass ratios in donors who recovered from COVID-19 and those vaccinated with Sputnik V. The data were obtained by ELISA. The mean values for three independent experiments are presented, with errors of measurement not exceeding 5%.

| Donor ID         | IgG1               | IgG2               | IgG3            | IgG4             |
|------------------|--------------------|--------------------|-----------------|------------------|
| <b>HTD</b>       |                    |                    |                 |                  |
| 1020             | 44.8               | 48.0               | 3.9             | 3.2              |
| 1026             | 52.4               | 39.3               | 1.6             | 6.8              |
| 1116             | 46.3               | 47.3               | 2.7             | 3.7              |
| 1117             | 58.2               | 26.7               | 9.3             | 5.8              |
| 1156             | 48.3               | 31.6               | 9.3             | 10.8             |
| 1159             | 75.3               | 17.0               | 4.5             | 3.2              |
| 1164             | 83.7               | 6.3                | 1.1             | 9.0              |
| Mean ± SD        | 58.4 ± 15.3        | 30.9 ± 15.5        | 4.6 ± 3.4       | 6.1 ± 3.0        |
| Median [Q1; Q3]; | 52.4 [46.3; 75.3]; | 31.6 [17.0; 47.3]; | 3.9 [1.6; 9.3]; | 5.8 [3.2; 9.0];  |
| Min–Max          | 44.8–83.7          | 6.3–48.0           | 1.1–9.3         | 3.2–10.8         |
| <b>MTD</b>       |                    |                    |                 |                  |
| 1017             | 27.9               | 52.6               | 13.2            | 6.3              |
| 1033             | 33.0               | 56.3               | 6.5             | 4.2              |
| 1040             | 60.0               | 26.8               | 4.9             | 8.3              |
| 1048             | 47.8               | 39.2               | 1.7             | 11.3             |
| 1090             | 56.5               | 34.2               | 1.3             | 8.0              |
| 1091             | 86.4               | 11.9               | 0.7             | 1.0              |
| 1095             | 81.7               | 15.3               | 1.4             | 1.6              |
| Mean ± SD        | 56.1 ± 22.3        | 33.8 ± 17.1        | 4.2 ± 4.5       | 5.8 ± 3.8        |
| Median [Q1; Q3]; | 56.5 [33.0; 81.7]; | 34.2 [15.3; 52.6]; | 1.7 [1.3; 6.5]; | 6.3 [1.6; 8.3];  |
| Min–Max          | 33.0–81.7          | 11.9–56.3          | 0.7–13.2        | 1.0–11.3         |
| <b>VTD</b>       |                    |                    |                 |                  |
| 2011             | 35.5               | 56.2               | 5.6             | 2.8              |
| 2012             | 40.6               | 44.9               | 10.2            | 4.3              |
| 2013             | 42.7               | 43.5               | 9.7             | 4.2              |
| 2017             | 59.0               | 22.6               | 7.2             | 11.1             |
| 2018             | 66.7               | 27.2               | 4.8             | 1.4              |
| 2019             | 66.5               | 24.0               | 7.5             | 2.0              |
| 2020             | 33.6               | 55.8               | 3.6             | 7.1              |
| Mean ± SD        | 49.2 ± 14.4        | 39.2 ± 14.5        | 6.9 ± 2.5       | 4.7 ± 3.4        |
| Median [Q1; Q3]; | 42.7 [35.5; 66.5]; | 43.5 [24.0; 55.8]; | 7.2 [4.8; 9.7]; | 4.2 [2.0; 7.1];  |
| Min–Max          | 33.6–66.7          | 22.6–56.2          | 3.6–10.2        | 1.4–11.1         |
| <b>NTD</b>       |                    |                    |                 |                  |
| 1027             | 66.4               | 21.1               | 5.3             | 7.1              |
| 1034             | 52.4               | 30.8               | 3.9             | 12.9             |
| 1044             | 80.0               | 10.9               | 3.9             | 5.2              |
| 1050             | 51.6               | 36.6               | 6.5             | 5.3              |
| 1059             | 81.9               | 9.0                | 2.6             | 6.5              |
| 1061             | 69.6               | 12.2               | 2.2             | 16.0             |
| 1037             | 38.8               | 53.5               | 2.7             | 5.0              |
| Mean ± SD        | 63.0 ± 16.0        | 24.9 ± 16.4        | 9.3 ± 1.6       | 8.3 ± 4.4        |
| Median [Q1; Q3]; | 66.4 [51.6; 80.0]; | 21.1 [10.9; 36.6]; | 3.9 [2.6; 5.3]; | 6.5 [5.2; 12.9]; |

Min–Max 38.8–81.9 9.0–53.5 2.2–6.5 5.0–16.0

**Table S2.** IgG1–IgG4 antibody subclass ratio in IgG fractions (total IgG, RBD-IgG, and S\*-IgG) isolated from the blood plasma of three donor groups. The assay was performed by ELISA. The mean values of three independent experiments are given, the error did not exceed 5%.

|            | IgG, % | RBD-IgG, % | S*-IgG, % |
|------------|--------|------------|-----------|
| <b>HTD</b> |        |            |           |
| IgG1       | 58.4   | 48.7       | 14.8      |
| IgG2       | 30.9   | 42.6       | 79.6      |
| IgG3       | 4.6    | 6.2        | 2.2       |
| IgG4       | 6.1    | 2.5        | 3.4       |
| <b>MTD</b> |        |            |           |
| IgG1       | 56.1   | 51.0       | 22.7      |
| IgG2       | 33.8   | 44.9       | 72.4      |
| IgG3       | 4.2    | 1.4        | 1.5       |
| IgG4       | 5.8    | 2.7        | 3.4       |
| <b>HTV</b> |        |            |           |
| IgG1       | 49.2   | 43.4       | 48.6      |
| IgG2       | 39.2   | 48.0       | 42.7      |
| IgG3       | 6.9    | 5.5        | 6.2       |
| IgG4       | 4.7    | 3.1        | 2.5       |

In the case of all used individual preparations of IgGs, titers of antibodies against DNA, their average values for each of the groups are presented (IU/ml; Supplementary Table S3): HTD ( $10.9 \pm 21.8$ ), MTD ( $16.6 \pm 34.0$ ), HTV ( $20.7 \pm 59.4$ ), NTD ( $11.3 \pm 26.8$ ). It should be noted that the sets of relative concentrations of anti-DNA-IgG were different in each of the four groups and did not correspond to the Gaussian distribution.

**Table S3.** Analysis of DNA-hydrolyzing antibody activity and ELISA of anti-dsDNA-IgG in four groups of patients and donors.

| HTD               |                  | MTD               |                  | HTV               |                  | NTD               |                  |
|-------------------|------------------|-------------------|------------------|-------------------|------------------|-------------------|------------------|
| DNA hydrolysis, % | dsDNA-IgG, IU/ml |
| 10.1              | 3.9              | 5.2               | 0.0              | 3.4               | 0.0              | 3.0               | 0                |
| 7.4               | 0.0              | 10.7              | 49.6             | 2.4               | 279.5            | 8.3               | 81.7             |
| 7.0               | 0.0              | 7.7               | 0.0              | 3.4               | 3.9              | 2.5               | 102.4            |
| 8.5               | 0.0              | 8.3               | 0.0              | 4.3               | 0.0              | 1.1               | 47.9             |
| 3.3               | 0.0              | 18.2              | 0.0              | 2.9               | 113.5            | 0.4               | 0.0              |
| 5.8               | 30.1             | 5.3               | 10.0             | 0.5               | 0.0              | 4.7               | 0.5              |
| 4.6               | 0.0              | 8.0               | 0.0              | 1.3               | 0.0              | 7.8               | 2.0              |
| 4.4               | 0.0              | 3.0               | 0.0              | 0.0               | 0.0              | 3.5               | 2.0              |
| 6.7               | 10.5             | 3.9               | 0.0              | 15.1              | 5.8              | 2.5               | 0.0              |
| 4.5               | 2.0              | 9.5               | 122.8            | 6.1               | 0.0              | 2.3               | 0.0              |
| 4.4               | 0.0              | 16.4              | 0.0              | 4.3               | 0.0              | 3.7               | 0.0              |
| 8.1               | 0.0              | 4.8               | 8.1              | 5.6               | 14.3             | 4.4               | 0.0              |
| 8.5               | 0.0              | 0.3               | 5.5              | 6.8               | 0.0              | 10.1              | 1.8              |
| 11.7              | 1.0              | 6.7               | 3.0              | 10.9              | 0.9              | 6.0               | 0.0              |
| 10.5              | 28.2             | 4.5               | 1.5              | 7.8               | 0.0              | 2.7               | 0.0              |

|                          |              |           |             |           |             |           |                |
|--------------------------|--------------|-----------|-------------|-----------|-------------|-----------|----------------|
| 8.8                      | 0.0          | 4.4       | 0.1         | 11.3      | 0.0         | 4.5       | 0.0            |
| 9.0                      | 0.0          | 7.8       | 0.0         | 9.6       | 0.0         | 0.9       | 0.0            |
| 5.7                      | 85.0         | 6.6       | 0.0         | 9.2       | 0.0         | 9.9       | 11.2           |
| 6.5                      | 58.9         | 7.4       | 13.9        | 10.8      | 58.5        | 6.3       | 29.2           |
| 7.4                      | 10.2         | 7.4       | 13.5        | 9.7       | 21.6        | 3.2       | 0.0            |
| 6.6                      | 1.2          | 7.0       | 0.0         | 14.0      | 14.2        | 7.5       | 0.0            |
| 11.1                     | 42.4         | 6.6       | 93.8        | 13.2      | 0.0         | 8.5       | 0.0            |
| 0.0                      | 0.0          | 7.4       | 6.0         | 9.7       | 6.5         | 8.7       | 1.8            |
| 2.4                      | 0.0          | 6.1       | 87.5        | 12.2      | 0.0         | 7.3       | 0.0            |
| 4.9                      | 0.0          | 4.4       | 0.0         | 8.9       | 0.0         | 0.6       | 0.7            |
| Mean ± SD                |              |           |             |           |             |           |                |
| 6.7 ± 2.8                | 10.9 ± 21.8  | 7.1 ± 3.8 | 16.6 ± 34.0 | 7.3 ± 4.4 | 20.7 ± 59.4 | 4.8 ± 3.0 | 11.3 ± 26.8    |
| Median [Q1; Q3]; Min–Max |              |           |             |           |             |           |                |
| 6.7 [4.6;                |              | 6.7 [4.8; | 0.1 [0;     | 7.8 [3.4; |             | 4.4 [2.5; |                |
| 8.5];                    | 0 [0; 10.2]; | 7.8];     | 10.0];      | 10.8];    | 0 [0; 6.5]; | 7.5];     | 0 [0; 2.0]; 0– |
| 0–11.7                   | 0–85.0       | 0.3–18.2  | 0–122.8     | 0–15.1    | 0–279.5     | 0.4–10.1  | 102.4          |

**Figure S1.**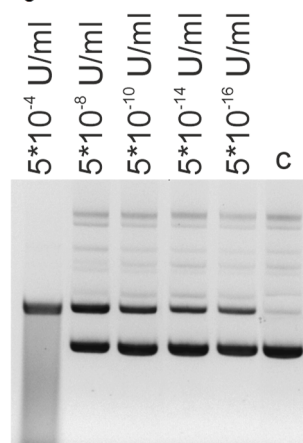

**Figure S1.** Hydrolysis of pBluescript plasmid DNA by DNase I at various final concentrations after incubation for 48 h at 37 °C; c – control samples incubated without enzymes. One unit of enzyme activity of DNase I, according to the supplier's instruction, completely degrades 1 µg of plasmid DNA in 10 min at 37 °C (EN0525, Thermo, Waltham MA, USA).

**Table S4.** Conversion of IgG catalytic activity to the enzyme activity units corresponding to the DNase I.

| HTD        |                                            |  | MTD        |                                            |  | HTV        |                                            | NTD      |                                            |
|------------|--------------------------------------------|--|------------|--------------------------------------------|--|------------|--------------------------------------------|----------|--------------------------------------------|
| Patient ID | DNase activity<br>×1019,<br>U/mg of<br>IgG |  | Patient ID | DNase activity<br>×1019,<br>U/mg of<br>IgG |  | Patient ID | DNase activity<br>×1019,<br>U/mg of<br>IgG | Donor ID | DNase activity<br>×1019,<br>U/mg of<br>IgG |
| 1020       | 390                                        |  | 1017       | 39                                         |  | 2011       | 17                                         | 1021     | 57                                         |
| 1026       | 110                                        |  | 1033       | 520                                        |  | 2012       | 11                                         | 1027     | 8300                                       |
| 1116       | 92                                         |  | 1040       | 130                                        |  | 2013       | 17                                         | 1034     | 36                                         |
| 1117       | 190                                        |  | 1048       | 170                                        |  | 2017       | 26                                         | 1044     | 10                                         |
| 1156       | 16                                         |  | 1090       | 18000                                      |  | 2018       | 13                                         | 1050     | 5                                          |
| 1159       | 52                                         |  | 1091       | 41                                         |  | 2019       | 2,7                                        | 1059     | 280                                        |

|           |               |                   |               |      |          |      |           |
|-----------|---------------|-------------------|---------------|------|----------|------|-----------|
| 1164      | 30            | 1095              | 150           | 2020 | 6,3      | 1061 | 5000      |
| 1167      | 27            | 1108              | 14            | 2021 | 3,4      | 1037 | 92        |
| 1168      | 80            | 1111              | 21            | 2022 | 4100     | 1038 | 36        |
| 1169      | 28            | 1129              | 300           | 2024 | 60       | 1039 | 30        |
| 1170      | 27            | 1150              | 7500          | 2025 | 26       | 1041 | 111       |
| 1131      | 150           | 1172              | 33            | 2026 | 48       | 1042 | 213       |
| 1132      | 190           | 1262              | 4             | 2027 | 84       | 1043 | 45000     |
| 1136      | 830           | 1168              | 80            | 2030 | 570      | 1051 | 960       |
| 1137      | 470           | 1169              | 28            | 2032 | 130      | 1056 | 43        |
| 1138      | 210           | 1170              | 27            | 2033 | 690      | 1058 | 230       |
| 1140      | 230           | 1171              | 130           | 2034 | 310      | 1062 | 8         |
| 1142      | 50            | 1173              | 76            | 2035 | 260      | 1067 | 37000     |
| 1143      | 73            | 1174              | 110           | 2036 | 550      | 1069 | 1300      |
| 1145      | 110           | 1175              | 110           | 2037 | 330      | 1096 | 69        |
| 1146      | 76            | 1182              | 92            | 2038 | 2400     | 1104 | 3900      |
| 1176      | 630           | 1184              | 76            | 2040 | 1700     | 1109 | 10000     |
| 1180      | 3,4           | 1189              | 110           | 2041 | 330      | 1114 | 12000     |
| 1231      | 11            | 1190              | 60            | 2042 | 1100     | 1119 | 3200      |
| 1241      | 34            | 1167              | 27            | 2062 | 220      | 1125 | 6         |
| Median    | 80 [30; 190]; |                   | 80 [33; 130]; |      | 130 [17; |      | 213 [36;  |
| [Q1; Q3]; | 3.4–830       |                   | 4.0–18000     |      | 550];    |      | 3900];    |
| Min–Max   |               |                   |               |      | 2.7–4100 |      | 5.0–45000 |
| x 10^19,  |               |                   |               |      |          |      |           |
| U/mg      |               | N.A. <sup>1</sup> |               | N.A. |          | N.A. |           |

<sup>1</sup> N.A. - not applicable
